# Supplementary material for: Circulating miRNAs as novel diagnostic biomarkers in hepatocellular carcinoma detection: a meta-analysis based on 24 articles
Source: PubMed Central journal article supplement (PMC5630422; doi:10.18632/oncotarget.18949), 2017-07-04
Supplement: oncotarget-08-66402-s001.pdf [file oncotarget-08-66402-s001.pdf]

## **Circulating miRNAs as novel diagnostic biomarkers in hepatocellular carcinoma detection: a meta-analysis based on 24 articles**

### **Supplementary Materials**

**Supplementary Table 1: Main characteristics of the 24 articles on hepatocellular carcinoma included in the meta-analysis. See Supplementary\_Table\_1**
